# Supplementary material for: A Pan-Lyssavirus Taqman Real-Time RT-PCR Assay for the Detection of Highly Variable Rabies virus and Other Lyssaviruses
Source: PLoS Negl Trop Dis. 2017 Jan 12;11(1):e0005258. doi: 10.1371/journal.pntd.0005258 (PMC5230753; doi:10.1371/journal.pntd.0005258)
Supplement: S1 Table — (XLS) [file pntd.0005258.s003.xls]

## Sheet: MatrixOutput
1-RussiaRABV
2-ChinaRABV	0.124659
3-PeruRABV	0.122431	0.0900327
4-ThailandRABV	0.156394	0.149174	0.152111
5-ThailandRABV	0.153613	0.151754	0.151037	0.0302137
6-ThailandRABV	0.153613	0.151754	0.151037	0.0302137	0
7-MexicoRABV	0.133598	0.0822159	0.0819846	0.142267	0.148645	0.148645
8-MexicoRABV	0.136751	0.0802401	0.0833466	0.149972	0.152479	0.152479	0.0413041
9-SriLankaRABV	0.144444	0.130635	0.130186	0.138595	0.140601	0.140601	0.140379	0.147192
10-TunisiaRABV	0.121298	0.077902	0.0751495	0.150742	0.154099	0.154099	0.0871236	0.0818107	0.130504
11-IndiaRABV	0.0663616	0.113277	0.103984	0.171629	0.161685	0.161685	0.113796	0.113478	0.143788	0.104108
12-IndiaRABV	0.149923	0.146356	0.142305	0.142673	0.143835	0.143835	0.149251	0.152582	0.0513942	0.139305	0.152686
13-IndiaRABV	0.133332	0.0219017	0.0930447	0.155568	0.157296	0.157296	0.0859693	0.0847918	0.143724	0.0816228	0.118366	0.159033
14-IndiaRABV	0.149201	0.135459	0.134058	0.137286	0.138297	0.138297	0.135716	0.140804	0.0574909	0.133723	0.151226	0.0451269	0.150511
15-GABONRABV	0.119582	0.081274	0.0719483	0.156097	0.154233	0.154233	0.0813083	0.0800982	0.128696	0.0545583	0.102425	0.140115	0.0858091	0.13882
16-PeruRABV	0.13517	0.0911357	0.0926012	0.150802	0.155208	0.155208	0.0972179	0.0918136	0.139003	0.0876076	0.111909	0.154121	0.0974636	0.1441	0.0811997
17-ArizonaBatRABV	0.189447	0.1742	0.168094	0.188014	0.188353	0.188353	0.171814	0.165842	0.16057	0.165793	0.185942	0.162855	0.180957	0.157066	0.167379	0.185766
18-ArizonaBatRABV	0.184266	0.165948	0.163714	0.177731	0.188258	0.188258	0.171942	0.172436	0.162678	0.159362	0.186659	0.169572	0.178178	0.161001	0.174389	0.172454	0.126005
19-TennesseeBatRABV	0.187769	0.175173	0.163618	0.187721	0.191883	0.191883	0.170759	0.165915	0.163203	0.160432	0.18693	0.166509	0.181946	0.161529	0.164671	0.182198	0.0294796	0.129187
20-TennesseeBatRABV	0.182725	0.179411	0.170598	0.190696	0.191999	0.191999	0.176825	0.17467	0.159349	0.169993	0.186622	0.169023	0.188049	0.16487	0.171451	0.182707	0.0371622	0.129204	0.0371233
21-TennesseeBatRABV	0.182634	0.177617	0.166969	0.189503	0.190801	0.190801	0.172333	0.167214	0.157635	0.170924	0.183871	0.163547	0.186229	0.163068	0.163321	0.178133	0.0309807	0.126651	0.0348283	0.0134508
22-WashingtonBatRABV	0.188956	0.172946	0.165817	0.185553	0.190505	0.190505	0.176192	0.170145	0.151351	0.166378	0.182625	0.156462	0.184338	0.156121	0.171595	0.180705	0.0552977	0.107513	0.0608919	0.056062	0.0576485
23-WashnigtonBatRABV	0.158766	0.163306	0.155991	0.160734	0.167288	0.167288	0.16576	0.162464	0.131804	0.150755	0.166536	0.14572	0.173544	0.132032	0.161614	0.171689	0.127074	0.115496	0.124439	0.126853	0.123386	0.110515
24-WashingtonBatRABV	0.172222	0.154894	0.152376	0.160559	0.16625	0.16625	0.156536	0.152337	0.147182	0.157423	0.176101	0.157724	0.166809	0.148274	0.158419	0.171281	0.136193	0.118101	0.139587	0.14232	0.136992	0.118499	0.0855995
25-WashingtonBatRABV	0.188956	0.172946	0.165817	0.185553	0.190505	0.190505	0.176192	0.170145	0.151351	0.166378	0.182625	0.156462	0.184338	0.156121	0.171595	0.180705	0.0552977	0.107513	0.0608919	0.056062	0.0576485	0	0.110515	0.118499
26-ArizonaBatRABV	0.165218	0.157233	0.150758	0.155432	0.158419	0.158419	0.157965	0.158344	0.136927	0.150947	0.168666	0.14734	0.165598	0.138141	0.1598	0.169878	0.108914	0.0939903	0.108077	0.10122	0.102943	0.0901154	0.084493	0.096321	0.0901154
27-AlabamaBatRABV	0.191307	0.175139	0.164349	0.188513	0.190763	0.190763	0.172538	0.170329	0.156866	0.164865	0.186632	0.160128	0.18191	0.157866	0.163489	0.181127	0.0241088	0.122269	0.0287081	0.0348149	0.0309603	0.0513391	0.125126	0.134058	0.0513391	0.109695
28-CaliforniaBatRABV	0.164709	0.161072	0.150299	0.150486	0.157894	0.157894	0.156446	0.158735	0.137803	0.146108	0.156721	0.143622	0.17303	0.13522	0.156858	0.16149	0.122309	0.111612	0.118888	0.116334	0.118035	0.100867	0.0648049	0.0780936	0.100867	0.0801207	0.120543
29-BrazilBatRABV	0.182234	0.169505	0.156621	0.170532	0.17789	0.17789	0.166786	0.170119	0.162416	0.167444	0.184855	0.16236	0.17723	0.153643	0.162232	0.175338	0.145907	0.1235	0.144204	0.135213	0.133534	0.124458	0.111434	0.128159	0.124458	0.0962764	0.136934	0.109581
30-MexicoBatRABV	0.19489	0.197026	0.182652	0.19227	0.201654	0.201654	0.179002	0.186492	0.18597	0.184763	0.204062	0.182452	0.205205	0.180957	0.185623	0.197476	0.164133	0.138657	0.159583	0.153056	0.156798	0.145676	0.130555	0.148714	0.145676	0.118456	0.156593	0.133148	0.0602277
31-TexasSkunkRABV	0.177829	0.115956	0.142144	0.161905	0.165753	0.165753	0.141905	0.146072	0.16974	0.145846	0.157363	0.166489	0.12726	0.170001	0.146844	0.151402	0.169511	0.163996	0.168523	0.171184	0.169225	0.160765	0.145004	0.14303	0.160765	0.147947	0.174937	0.139394	0.172224	0.188989
32-TexasSkunkRABV	0.188115	0.183084	0.176124	0.170303	0.179839	0.179839	0.1725	0.180412	0.178009	0.179127	0.188989	0.174245	0.19589	0.178895	0.181421	0.192776	0.169649	0.162177	0.172317	0.167586	0.163875	0.153051	0.138885	0.132566	0.153051	0.14406	0.174113	0.131478	0.170144	0.183128	0.0718815
33-CaliforniaSkunkRABV	0.125446	0.089288	0.0809849	0.154032	0.153086	0.153086	0.0854031	0.0834095	0.139726	0.0843087	0.0839059	0.146722	0.0930945	0.145528	0.0811156	0.0883833	0.179755	0.178124	0.177107	0.182272	0.178515	0.180231	0.16714	0.167961	0.180231	0.163949	0.177922	0.159063	0.174463	0.192725	0.148215	0.186182
34-CaliforniaSkunkRABV	0.127171	0.0892265	0.0809296	0.15407	0.153123	0.153123	0.0870082	0.0866225	0.141471	0.0859073	0.0871791	0.146687	0.09303	0.145493	0.0827115	0.0883225	0.177922	0.178168	0.177063	0.180436	0.176687	0.178401	0.165338	0.166068	0.178401	0.162149	0.174222	0.159024	0.171662	0.192677	0.146298	0.186135	0.0104439
35-WisconsinSkunkRABV	0.114355	0.0768244	0.0718747	0.146864	0.148706	0.148706	0.0828498	0.0857293	0.126786	0.0615932	0.102317	0.125788	0.084572	0.125433	0.0664329	0.0793485	0.17449	0.16546	0.169986	0.171486	0.171486	0.173239	0.154755	0.159021	0.173239	0.146139	0.174533	0.14827	0.162727	0.179021	0.147317	0.183468	0.0752057	0.0751887
36-SouthDakotaSkunkRABV	0.127269	0.0843176	0.0784049	0.157905	0.156113	0.156113	0.0903406	0.092462	0.138108	0.0712887	0.11002	0.14532	0.0880954	0.144937	0.0713048	0.0762401	0.176563	0.165646	0.170942	0.167034	0.167034	0.174154	0.159341	0.159122	0.174154	0.155923	0.167355	0.156585	0.155416	0.177045	0.156522	0.190418	0.0769291	0.0769116	0.0543567
37-ArkansasSkunkRABV	0.12642	0.0812368	0.0712479	0.153755	0.151968	0.151968	0.0896507	0.0860057	0.132363	0.0633243	0.104143	0.141236	0.0849933	0.137286	0.0681537	0.0780264	0.178851	0.169664	0.173373	0.173941	0.17207	0.174679	0.158974	0.16295	0.174679	0.1565	0.173339	0.158766	0.160621	0.180289	0.143913	0.180866	0.0762493	0.0778393	0.0497551	0.0388392
38-PuertoRicoMongooseRABV	0.136703	0.10423	0.0988527	0.169968	0.169926	0.169926	0.112255	0.110933	0.149451	0.0882802	0.122615	0.157578	0.109102	0.152797	0.0867255	0.105929	0.189728	0.193582	0.185293	0.189623	0.192357	0.189547	0.176165	0.179799	0.189547	0.173614	0.192834	0.173158	0.181245	0.19825	0.166761	0.201484	0.104974	0.107444	0.0732922	0.082396	0.0817355
39-PuertoRicoMongooseRABV	0.126534	0.0909776	0.0825303	0.161846	0.160846	0.160846	0.0979834	0.0975668	0.141573	0.0802724	0.108488	0.144461	0.094824	0.146442	0.0763188	0.0919193	0.174896	0.170372	0.171187	0.173666	0.173666	0.172664	0.163243	0.163964	0.172664	0.157387	0.174088	0.160391	0.165924	0.184265	0.155925	0.188867	0.0843904	0.0851805	0.056782	0.0664814	0.0626127	0.0499393
40-FloridaCatRABV	0.163483	0.154384	0.146167	0.157102	0.16537	0.16537	0.149506	0.142646	0.152317	0.147217	0.160492	0.152976	0.162695	0.147974	0.148993	0.16525	0.120584	0.119124	0.117036	0.119575	0.112661	0.109929	0.0844781	0.094951	0.109929	0.0972056	0.122246	0.0876771	0.113558	0.132863	0.147015	0.139702	0.149214	0.14925	0.139822	0.152251	0.153576	0.162552	0.142833
41-SerbiaRABV	0.121983	0.0910679	0.0824884	0.154212	0.155999	0.155999	0.0855859	0.0868271	0.138056	0.0665237	0.101824	0.150364	0.0956978	0.143741	0.0658177	0.0853232	0.177169	0.172971	0.17801	0.1804	0.177632	0.174	0.165671	0.161781	0.174	0.169528	0.178914	0.163717	0.173734	0.192958	0.156446	0.180821	0.0835768	0.0835195	0.0769344	0.0803133	0.07628	0.0949611	0.0794933	0.156943
42-TexasCoyoteRABV	0.135213	0.0739101	0.0835151	0.145811	0.150058	0.150058	0.0516082	0.0474891	0.13164	0.0754343	0.116167	0.145682	0.0775959	0.131412	0.08286	0.0869974	0.162695	0.16625	0.169082	0.170547	0.168597	0.169589	0.159214	0.15458	0.169589	0.157771	0.166209	0.15801	0.171516	0.188751	0.139977	0.17691	0.0860466	0.0876493	0.0834388	0.0860998	0.0796636	0.106984	0.0961257	0.144828	0.0871036
43-TexasCoyoteRABV	0.128777	0.0704672	0.0784103	0.141823	0.144314	0.144314	0.0467391	0.0426691	0.12778	0.0719857	0.109911	0.139111	0.072501	0.128387	0.0777508	0.0826592	0.156805	0.160331	0.161364	0.164598	0.16267	0.16365	0.153381	0.148762	0.16365	0.151939	0.160291	0.153942	0.165556	0.182616	0.134299	0.170845	0.0809168	0.0825086	0.0807457	0.0809664	0.074576	0.101631	0.0909036	0.139126	0.0819515	0.00746286
44-TexasCoyoteRABV	0.12773	0.0688575	0.0766933	0.140062	0.144279	0.144279	0.048314	0.0442316	0.126964	0.071912	0.108911	0.140007	0.0724845	0.126715	0.0776707	0.0826781	0.161253	0.162018	0.16668	0.167297	0.165361	0.164494	0.155966	0.148524	0.164494	0.152776	0.164752	0.153033	0.16463	0.181668	0.133229	0.169669	0.0809352	0.0825274	0.079943	0.081772	0.0753002	0.102412	0.0900486	0.139126	0.0834813	0.00896308	0.00594886
45-AlaskaArcticFoxRABV	0.0818797	0.12978	0.118984	0.161072	0.162798	0.162798	0.132983	0.128886	0.147441	0.120397	0.0861347	0.150868	0.140258	0.149417	0.123672	0.126641	0.174697	0.174243	0.177503	0.182771	0.180077	0.174942	0.158743	0.166864	0.174942	0.160587	0.180292	0.154922	0.17213	0.188514	0.166112	0.180087	0.123828	0.125493	0.118555	0.129029	0.122943	0.145413	0.124807	0.153488	0.120296	0.130198	0.125493	0.123607
46-ArizonaGrayFoxRABV	0.145566	0.0941062	0.101322	0.165068	0.171381	0.171381	0.0925762	0.0922795	0.144383	0.106675	0.135912	0.160551	0.099648	0.148532	0.0964347	0.107578	0.188258	0.189198	0.181446	0.186435	0.185697	0.188675	0.173683	0.17852	0.188675	0.173623	0.178565	0.174216	0.182341	0.195148	0.16613	0.206594	0.108962	0.107223	0.0964347	0.102328	0.101668	0.123506	0.115882	0.163794	0.110936	0.095893	0.0930995	0.0923008	0.149153
47-ArizonaGrayFoxRABV	0.13199	0.0830691	0.0901888	0.151659	0.152776	0.152776	0.0815091	0.0836975	0.133141	0.0937879	0.119052	0.145594	0.0859937	0.138928	0.0837403	0.0954894	0.18186	0.179831	0.174433	0.180336	0.175763	0.18319	0.165541	0.170456	0.18319	0.164664	0.175052	0.166887	0.176844	0.192454	0.154415	0.19405	0.0944479	0.0927475	0.0902623	0.0895505	0.0905139	0.115475	0.102027	0.154821	0.0963281	0.0880548	0.0828877	0.0853383	0.131166	0.0233441
48-TexasGrayFoxRABV	0.12841	0.0490147	0.0883209	0.144831	0.146534	0.146534	0.0812226	0.0809296	0.137601	0.0737619	0.117708	0.14921	0.0564082	0.138193	0.0795253	0.0942669	0.171011	0.170574	0.176441	0.176066	0.179082	0.175348	0.164317	0.153986	0.175348	0.15644	0.174731	0.162219	0.172359	0.189366	0.134505	0.190882	0.0916594	0.0915962	0.0784679	0.084254	0.0836003	0.102418	0.0933955	0.149879	0.0909567	0.0738379	0.0703987	0.0704147	0.129928	0.0814761	0.0755414
49-TexasFoxRABV	0.117825	0.0388674	0.077603	0.141103	0.142764	0.142764	0.0723264	0.0712119	0.135611	0.0672123	0.104827	0.140959	0.0445662	0.136128	0.0705225	0.0834902	0.163483	0.16307	0.167281	0.171486	0.167855	0.168758	0.155116	0.152939	0.168758	0.153563	0.165477	0.154725	0.161262	0.181795	0.127336	0.182166	0.0760233	0.0744059	0.0662081	0.070394	0.0680994	0.0931093	0.0777672	0.1453	0.0802218	0.0681619	0.0631778	0.0647758	0.12204	0.0815422	0.0698958	0.0286845
50-TexasGrayFoxRABV	0.12654	0.0489762	0.0866301	0.143769	0.145468	0.145468	0.0828586	0.0808645	0.136628	0.0721037	0.11593	0.146399	0.0563635	0.138935	0.0786562	0.092516	0.171749	0.169448	0.17738	0.17794	0.179818	0.174215	0.165056	0.154729	0.174215	0.157181	0.174576	0.16112	0.173099	0.189461	0.133464	0.189696	0.088296	0.0882354	0.0775854	0.0825723	0.081917	0.0989801	0.0908553	0.150619	0.0892564	0.0737787	0.0703426	0.0703585	0.128118	0.0847619	0.076284	0.00445977	0.0286625
51-NamibiaLionRABV	0.124517	0.0820077	0.0760273	0.158843	0.161662	0.161662	0.0788743	0.0720835	0.140259	0.0536819	0.106537	0.149957	0.084915	0.148583	0.0521784	0.0827304	0.174036	0.172139	0.169523	0.172723	0.170858	0.176397	0.166969	0.166386	0.176397	0.163443	0.172206	0.1639	0.173321	0.189489	0.149835	0.181609	0.0843666	0.0826926	0.0671971	0.0729691	0.0657504	0.0933056	0.0754635	0.157957	0.0633604	0.0728622	0.0678496	0.0693663	0.127225	0.102425	0.0887983	0.0811014	0.0688959
52-FranceRABV	0.122304	0.0885629	0.0817118	0.154632	0.161742	0.161742	0.0888865	0.0867874	0.137836	0.0657731	0.11104	0.153806	0.0939872	0.144481	0.0641687	0.0860755	0.178762	0.167116	0.181406	0.1803	0.179313	0.180274	0.164664	0.158536	0.180274	0.164632	0.180515	0.161442	0.172513	0.189852	0.160985	0.189724	0.0861149	0.0844349	0.0713296	0.0762187	0.0762626	0.0991667	0.0819789	0.155365	0.0349323	0.0887323	0.0851865	0.0850981	0.126467	0.106764	0.0955064	0.0852496	0.0769869
53-FranceRABV	0.120454	0.0876385	0.0783966	0.154421	0.159761	0.159761	0.0871437	0.0850592	0.135939	0.0656911	0.107558	0.150103	0.0905897	0.144286	0.0617114	0.0835386	0.178514	0.166886	0.179357	0.180049	0.177274	0.180023	0.164439	0.1592	0.180023	0.164407	0.178469	0.1621	0.170489	0.189585	0.161646	0.19037	0.0827682	0.0810971	0.0712403	0.0729195	0.0729614	0.0973884	0.078652	0.155154	0.0325828	0.0886193	0.0834623	0.0849905	0.124606	0.106625	0.0921073	0.0851416	0.0736862
54-GreeceRABV	0.116748	0.0926456	0.0791533	0.150554	0.154078	0.154078	0.0822492	0.0835004	0.1362	0.0632815	0.100012	0.148462	0.0956413	0.141005	0.0641321	0.0851955	0.173316	0.169131	0.172375	0.17476	0.173785	0.170255	0.160133	0.159839	0.170255	0.165802	0.176836	0.161778	0.171756	0.1891	0.156347	0.176912	0.0818753	0.0834711	0.0720221	0.0785846	0.074563	0.0882174	0.0761269	0.151454	0.00595142	0.0837654	0.0786437	0.0801712	0.120166	0.1092	0.0962713	0.0892769	0.0801754
55-ItalyRABV	0.127847	0.0962338	0.0876787	0.162257	0.16673	0.16673	0.094118	0.091975	0.145242	0.0732166	0.116479	0.159659	0.0992687	0.151981	0.0699761	0.0929207	0.183904	0.173156	0.185706	0.186398	0.1854	0.186371	0.170616	0.165328	0.186371	0.170583	0.186623	0.166419	0.178556	0.196077	0.168639	0.197771	0.0913057	0.0896094	0.0788245	0.0805124	0.082197	0.100803	0.0879675	0.161222	0.0412582	0.0955969	0.0903632	0.0918999	0.132863	0.113844	0.100793	0.0920647	0.0820929
56-LabStrainUSA	0.116852	0.0828294	0.0720172	0.14288	0.14025	0.14025	0.0887983	0.090841	0.13414	0.0705347	0.101566	0.136576	0.0865993	0.13352	0.071398	0.0828586	0.168525	0.179402	0.164842	0.169256	0.167396	0.175625	0.166732	0.15708	0.175625	0.159691	0.167512	0.161112	0.168507	0.187323	0.14821	0.182643	0.0778611	0.0811014	0.0593082	0.0641134	0.0577557	0.0883351	0.0739297	0.144356	0.0762667	0.0836931	0.0785763	0.0784952	0.113336	0.112626	0.098812	0.0900947	0.0761269
57-LabStrainUSA	0.120381	0.0134602	0.0874302	0.143788	0.147225	0.147225	0.0747849	0.0760751	0.13484	0.0729449	0.109865	0.150714	0.0188368	0.140623	0.0786658	0.0893542	0.167751	0.164141	0.170498	0.174722	0.174722	0.170196	0.160593	0.153035	0.170196	0.151873	0.170465	0.15921	0.165833	0.191406	0.115187	0.184124	0.0866865	0.0866271	0.0710946	0.079325	0.0762534	0.0990849	0.0867461	0.150787	0.0884145	0.0689748	0.0655684	0.0639693	0.127996	0.0881924	0.0796581	0.0434741	0.0364786
58-LabStrainEurope	0.120353	0.0119544	0.084177	0.143754	0.145453	0.145453	0.0739645	0.0744565	0.133102	0.0729283	0.106512	0.147197	0.0157991	0.140589	0.0754332	0.0860846	0.16771	0.1641	0.168674	0.174679	0.172894	0.170154	0.160554	0.152997	0.170154	0.151836	0.168641	0.159171	0.164019	0.191358	0.115159	0.184077	0.083433	0.0833759	0.0726714	0.0760964	0.0730277	0.0974111	0.0834902	0.15075	0.0851521	0.0689592	0.0639693	0.0639549	0.12627	0.0898068	0.0764151	0.0450188	0.033388
59-GeorgiaRABV	0.198799	0.185153	0.176621	0.180676	0.191405	0.191405	0.171093	0.186539	0.176703	0.189217	0.196578	0.181118	0.195824	0.179697	0.196887	0.200887	0.18156	0.157097	0.183262	0.176809	0.177705	0.162847	0.145735	0.136054	0.162847	0.150338	0.179491	0.142875	0.173701	0.186174	0.136604	0.117514	0.188713	0.188665	0.190764	0.191899	0.193038	0.212835	0.19503	0.143734	0.183468	0.181467	0.175364	0.176222	0.191416	0.207834	0.193469	0.182488	0.187026
60-ARAV	0.305514	0.318458	0.301122	0.302904	0.303961	0.303961	0.316523	0.323703	0.308828	0.319274	0.316431	0.294547	0.326586	0.301838	0.31348	0.327501	0.301195	0.303712	0.304616	0.305413	0.304674	0.301007	0.293044	0.292015	0.301007	0.285025	0.293231	0.297212	0.292206	0.311997	0.297271	0.29357	0.314166	0.312041	0.323373	0.315246	0.319018	0.333027	0.315534	0.301736	0.320221	0.307726	0.299523	0.300174	0.302329	0.319151	0.309821	0.307844	0.313903
61-KHUV	0.29261	0.303708	0.301271	0.292563	0.290821	0.290821	0.291722	0.292776	0.279925	0.314203	0.302919	0.289962	0.318688	0.296756	0.302317	0.301256	0.303339	0.304132	0.305786	0.312698	0.305347	0.301924	0.290072	0.287345	0.301924	0.297002	0.293784	0.296617	0.303958	0.305085	0.304375	0.304736	0.291568	0.297307	0.304969	0.301917	0.307358	0.313048	0.300558	0.288596	0.306948	0.295733	0.287132	0.288544	0.285814	0.309001	0.296939	0.30873	0.306304
62-DUVV	0.346787	0.323139	0.32533	0.32421	0.327951	0.327951	0.324659	0.322222	0.340778	0.316312	0.334789	0.331123	0.335671	0.342627	0.315175	0.323616	0.327959	0.350545	0.328591	0.336302	0.332074	0.335135	0.319301	0.33119	0.335135	0.334852	0.326131	0.343106	0.336649	0.334136	0.329701	0.340658	0.329327	0.328137	0.319825	0.308889	0.317698	0.328699	0.3142	0.327943	0.316189	0.322322	0.313772	0.314237	0.329996	0.336549	0.324071	0.324596	0.32741
63-65-A15-1873-DUVV	0.347082	0.323409	0.325601	0.324481	0.328225	0.328225	0.32493	0.322491	0.34207	0.316574	0.335071	0.332398	0.335956	0.34392	0.315436	0.322702	0.327045	0.349622	0.327675	0.335386	0.331158	0.334216	0.316869	0.330273	0.334216	0.333934	0.325217	0.342189	0.335735	0.335418	0.329979	0.340948	0.329604	0.328412	0.322254	0.309143	0.317961	0.32778	0.314461	0.327029	0.316452	0.322591	0.314032	0.314497	0.330273	0.336833	0.324341	0.324866	0.327684
64-DUVV	0.346787	0.326498	0.325521	0.320953	0.324691	0.324691	0.329201	0.32458	0.33737	0.320623	0.339373	0.325378	0.339091	0.339016	0.321829	0.324608	0.329148	0.353102	0.331975	0.337503	0.333271	0.334133	0.321126	0.334784	0.334133	0.33385	0.32732	0.344521	0.338049	0.342152	0.332287	0.336238	0.333905	0.330519	0.32651	0.311213	0.317698	0.3345	0.321063	0.326948	0.320513	0.325681	0.318272	0.316574	0.334571	0.335253	0.324964	0.325777	0.329785
65-DUVV	0.347082	0.324593	0.325792	0.324481	0.328225	0.328225	0.327298	0.32268	0.339861	0.31873	0.337463	0.32783	0.337164	0.341507	0.319934	0.322702	0.329424	0.354528	0.330061	0.337789	0.333552	0.334416	0.321394	0.335068	0.334416	0.334133	0.327594	0.344815	0.338335	0.340231	0.332568	0.338734	0.331991	0.330797	0.324611	0.31147	0.315805	0.334783	0.31916	0.327223	0.318614	0.327142	0.318536	0.316836	0.332659	0.333344	0.323068	0.327233	0.330062
66-ABLV	0.261536	0.266572	0.263964	0.251438	0.264275	0.264275	0.262646	0.265636	0.262513	0.251326	0.263412	0.260094	0.277715	0.270184	0.266759	0.264284	0.276757	0.280631	0.277024	0.278153	0.277566	0.280409	0.274401	0.280173	0.280409	0.280345	0.274993	0.276372	0.268236	0.276308	0.272952	0.273605	0.262801	0.263661	0.257517	0.260475	0.260806	0.283491	0.264798	0.268055	0.269742	0.264534	0.257456	0.259919	0.248646	0.275708	0.268203	0.261594	0.262788
67-ABLV	0.258248	0.261386	0.258801	0.249449	0.260107	0.260107	0.259648	0.258355	0.263661	0.246229	0.262264	0.261242	0.272443	0.268237	0.262504	0.259132	0.274638	0.277475	0.274903	0.276029	0.27544	0.276232	0.270272	0.276015	0.276232	0.276169	0.27507	0.274409	0.264113	0.27216	0.268804	0.270402	0.263806	0.264666	0.256518	0.259474	0.259803	0.282459	0.261628	0.264958	0.265622	0.259377	0.252349	0.254793	0.243423	0.269372	0.260864	0.256448	0.257632
68-EBLV-1	0.307787	0.31723	0.309995	0.324768	0.322148	0.322148	0.327035	0.323518	0.318692	0.305729	0.313285	0.331794	0.330552	0.329949	0.31501	0.322887	0.322243	0.336202	0.31749	0.314799	0.320402	0.32302	0.312924	0.319866	0.32302	0.327407	0.318498	0.30391	0.313795	0.329324	0.339451	0.333746	0.323518	0.32584	0.313697	0.312357	0.315929	0.329063	0.319575	0.314926	0.311998	0.316603	0.309792	0.311275	0.303616	0.329023	0.316342	0.326587	0.317492
69-EBLV-1	0.313385	0.3263	0.315698	0.327223	0.324593	0.324593	0.332842	0.329301	0.324577	0.31141	0.320106	0.338875	0.339797	0.335884	0.32117	0.327478	0.329245	0.342205	0.324478	0.320575	0.326212	0.328949	0.31877	0.325779	0.328949	0.332179	0.325489	0.309697	0.318482	0.331898	0.347716	0.339669	0.331573	0.333916	0.319409	0.318057	0.321653	0.334935	0.325345	0.32078	0.317729	0.322343	0.315471	0.316969	0.310355	0.337615	0.324773	0.331394	0.326571
70-EBLV1	0.301583	0.313516	0.306308	0.318194	0.314528	0.314528	0.321108	0.319952	0.313254	0.300913	0.31129	0.325058	0.326751	0.325616	0.307461	0.316908	0.320545	0.330175	0.315803	0.316452	0.319884	0.320418	0.310185	0.316097	0.320418	0.324782	0.316807	0.301209	0.312304	0.32705	0.336218	0.333396	0.31645	0.318752	0.312132	0.309086	0.312222	0.325344	0.311365	0.313346	0.31061	0.310749	0.304004	0.305471	0.301844	0.32367	0.311064	0.319502	0.311456
71-EBLV-2	0.317596	0.306962	0.310653	0.321724	0.321458	0.321458	0.299806	0.297779	0.325425	0.313526	0.327341	0.327485	0.319233	0.320422	0.301424	0.311012	0.318991	0.325852	0.319614	0.325994	0.32419	0.315335	0.31912	0.322942	0.315335	0.318381	0.316419	0.324206	0.312058	0.343253	0.316942	0.323218	0.317285	0.315672	0.312834	0.302561	0.311638	0.324883	0.301754	0.321385	0.319741	0.303543	0.293386	0.292647	0.326057	0.321899	0.315247	0.309742	0.308125
72-EBLV-2	0.323954	0.310771	0.29177	0.316372	0.319499	0.319499	0.291931	0.295444	0.315261	0.308579	0.329418	0.310963	0.318783	0.312043	0.297698	0.305138	0.317903	0.333801	0.317642	0.325092	0.319878	0.314433	0.312943	0.32571	0.314433	0.319533	0.314267	0.3146	0.315057	0.338646	0.314626	0.319489	0.311444	0.305247	0.305967	0.296653	0.310232	0.318141	0.302965	0.326486	0.315916	0.30272	0.291945	0.294413	0.329998	0.323052	0.311952	0.311608	0.30664
73-EBLV-2	0.325108	0.312086	0.300203	0.321818	0.324938	0.324938	0.297206	0.301983	0.321927	0.309208	0.333824	0.31735	0.32228	0.315319	0.299861	0.309777	0.320499	0.332895	0.322384	0.323209	0.32571	0.312374	0.318636	0.329126	0.312374	0.326841	0.313456	0.319053	0.31835	0.341328	0.31928	0.32302	0.315764	0.311847	0.308328	0.298985	0.310306	0.320467	0.300931	0.32774	0.321693	0.305952	0.297221	0.297614	0.327924	0.322243	0.318781	0.312924	0.31113
74-EBLV2	0.327182	0.310771	0.298037	0.317438	0.320563	0.320563	0.295052	0.296491	0.317392	0.309637	0.333742	0.315228	0.320936	0.312043	0.301886	0.307242	0.316832	0.332715	0.320857	0.326169	0.322024	0.315502	0.314009	0.326789	0.315502	0.320608	0.314267	0.31567	0.319347	0.339742	0.313553	0.320575	0.317815	0.311593	0.307022	0.298744	0.312357	0.321374	0.305072	0.327564	0.318044	0.303772	0.295066	0.295456	0.329998	0.321977	0.314077	0.312669	0.310876
75-IRKV	0.321091	0.324664	0.320468	0.324266	0.323533	0.323533	0.315011	0.319999	0.331698	0.321155	0.305853	0.318088	0.335749	0.332343	0.328945	0.328447	0.338759	0.329818	0.334787	0.337276	0.33535	0.348979	0.31794	0.324579	0.348979	0.323305	0.3305	0.306261	0.323627	0.330597	0.327797	0.3202	0.318715	0.316559	0.323501	0.328118	0.331194	0.337712	0.320186	0.313736	0.32217	0.323312	0.312162	0.315273	0.316403	0.331669	0.317718	0.326044	0.321248
76-BBLV	0.326137	0.310196	0.309853	0.33262	0.33783	0.33783	0.316402	0.313585	0.326901	0.307372	0.320671	0.328527	0.319228	0.342374	0.319305	0.32503	0.339136	0.337789	0.340943	0.334609	0.340943	0.328055	0.343731	0.336644	0.328055	0.344492	0.332078	0.35765	0.323675	0.340452	0.331113	0.345543	0.315197	0.313304	0.320873	0.312386	0.314242	0.322538	0.313174	0.326267	0.320328	0.308968	0.299183	0.301776	0.315322	0.33235	0.319754	0.308522	0.3069
77-MOKV	0.363915	0.35953	0.367575	0.382475	0.374764	0.374764	0.359732	0.363008	0.361848	0.362322	0.372914	0.351216	0.369262	0.358272	0.356536	0.379601	0.350412	0.37554	0.362322	0.352638	0.355718	0.368199	0.367939	0.351444	0.368199	0.363025	0.355406	0.362432	0.3661	0.369449	0.357694	0.363366	0.363437	0.355207	0.359328	0.356784	0.369236	0.371009	0.366346	0.365565	0.371939	0.3578	0.354636	0.354636	0.356186	0.375848	0.369787	0.355406	0.354173
78-MOKV	0.359379	0.353868	0.33914	0.365385	0.364108	0.364108	0.343962	0.357059	0.35895	0.360937	0.366373	0.357716	0.362398	0.36155	0.348863	0.360329	0.383593	0.365826	0.388213	0.37727	0.380515	0.381305	0.368997	0.357441	0.381305	0.369886	0.382203	0.374418	0.356531	0.369262	0.355009	0.363143	0.354669	0.352318	0.359908	0.363121	0.356967	0.367557	0.356626	0.378465	0.3661	0.352669	0.350027	0.348807	0.367636	0.369393	0.365538	0.360246	0.351606
79-MOKV	0.349662	0.360941	0.353501	0.364418	0.353647	0.353647	0.348614	0.345092	0.365205	0.353275	0.356028	0.350615	0.364982	0.357365	0.340113	0.37316	0.352543	0.369698	0.362365	0.359195	0.354897	0.369787	0.364102	0.37173	0.369787	0.363303	0.362881	0.368751	0.367236	0.379015	0.356611	0.369945	0.356119	0.350205	0.35217	0.346422	0.34188	0.363937	0.350027	0.367681	0.352335	0.354908	0.349534	0.351763	0.349453	0.368863	0.357166	0.359942	0.351942
80-MOKV	0.349333	0.35358	0.35217	0.366887	0.353456	0.353456	0.344652	0.35226	0.356551	0.354323	0.353394	0.352065	0.365731	0.359245	0.344072	0.367851	0.357401	0.356348	0.366791	0.352565	0.353185	0.370017	0.360506	0.345658	0.370017	0.353416	0.357585	0.366281	0.364387	0.371466	0.364176	0.369869	0.365291	0.358184	0.355553	0.357617	0.359572	0.38039	0.357092	0.357167	0.361598	0.357184	0.354521	0.351567	0.34474	0.371209	0.359011	0.351141	0.351533
81-MOKV	0.363804	0.357167	0.367462	0.380054	0.372362	0.372362	0.357367	0.360646	0.364213	0.362211	0.374167	0.353557	0.366869	0.360629	0.356428	0.379483	0.350306	0.375424	0.362211	0.352531	0.35561	0.368086	0.367827	0.351338	0.368086	0.360663	0.355298	0.362322	0.365988	0.369336	0.355332	0.360979	0.362194	0.353975	0.359219	0.35443	0.366858	0.373407	0.368727	0.367939	0.371824	0.355445	0.352293	0.352293	0.356079	0.373452	0.367412	0.353049	0.351819
82-LBV	0.365417	0.347249	0.351074	0.348086	0.345576	0.345576	0.344436	0.347075	0.352412	0.354971	0.357058	0.333004	0.356934	0.353791	0.364312	0.355931	0.364667	0.361942	0.360335	0.356569	0.359212	0.361774	0.354094	0.342152	0.361774	0.348761	0.356048	0.352169	0.340941	0.352961	0.334402	0.358788	0.335584	0.335485	0.340452	0.333045	0.356984	0.358306	0.350171	0.353372	0.361647	0.351707	0.344075	0.345075	0.355669	0.352693	0.348796	0.338356	0.351074
83-LBV	0.363486	0.349067	0.346629	0.34697	0.344459	0.344459	0.345418	0.347473	0.354643	0.351829	0.352908	0.331657	0.357565	0.3547	0.363723	0.35523	0.358702	0.361131	0.359086	0.361257	0.359413	0.359514	0.357853	0.341132	0.359514	0.351389	0.351462	0.355817	0.349197	0.361106	0.339499	0.354372	0.334869	0.334769	0.337343	0.33452	0.352729	0.356369	0.350681	0.35479	0.357365	0.353226	0.345573	0.346575	0.352626	0.352095	0.345988	0.337644	0.348151
84-LBV	0.350756	0.340233	0.345129	0.344066	0.34187	0.34187	0.342606	0.338967	0.35452	0.336563	0.34865	0.334587	0.345385	0.351941	0.344539	0.343461	0.359228	0.358256	0.353169	0.352669	0.355304	0.358089	0.351852	0.338479	0.358089	0.3516	0.353591	0.352047	0.338003	0.346559	0.329438	0.355259	0.327821	0.330452	0.32803	0.323844	0.338256	0.344478	0.339789	0.344761	0.346406	0.345747	0.339269	0.338072	0.349059	0.35573	0.351812	0.328956	0.334573
85-LBV	0.363174	0.343837	0.350071	0.345887	0.343375	0.343375	0.341027	0.343665	0.352412	0.353964	0.354831	0.333004	0.353478	0.353791	0.3633	0.353712	0.364667	0.361942	0.360335	0.356569	0.359212	0.361774	0.354094	0.342152	0.361774	0.348761	0.356048	0.352169	0.340941	0.352961	0.334402	0.358788	0.333392	0.333293	0.341652	0.334238	0.358207	0.359538	0.351389	0.353372	0.360635	0.348272	0.34067	0.341669	0.35466	0.35148	0.345387	0.334969	0.347648
86-SHIBV	0.372561	0.347706	0.341966	0.329196	0.343566	0.343566	0.344081	0.344065	0.344128	0.34028	0.365383	0.339784	0.350717	0.349429	0.344224	0.35164	0.329591	0.338782	0.330662	0.333134	0.337076	0.334188	0.334028	0.339051	0.334188	0.33923	0.326873	0.333414	0.326851	0.33964	0.331973	0.345936	0.361804	0.358092	0.339143	0.33744	0.33787	0.355104	0.337666	0.319525	0.345365	0.344391	0.337355	0.340195	0.363481	0.353994	0.344002	0.336898	0.344984
87-WCBV	0.352276	0.371584	0.341743	0.342106	0.338049	0.338049	0.357961	0.349518	0.361645	0.357889	0.353921	0.358243	0.373965	0.357315	0.355545	0.367541	0.35953	0.367714	0.373194	0.365085	0.35523	0.356859	0.364371	0.359656	0.356859	0.353771	0.359126	0.366665	0.374299	0.384604	0.350016	0.339926	0.365308	0.361583	0.352805	0.362212	0.358724	0.375088	0.364099	0.35247	0.365342	0.349324	0.342794	0.33991	0.350737	0.355541	0.345211	0.366617	0.360472
88-IKOV	0.420042	0.429374	0.435628	0.424101	0.419635	0.419635	0.420437	0.423117	0.436183	0.436856	0.434951	0.439075	0.437953	0.43823	0.439713	0.441985	0.422318	0.434564	0.425875	0.42113	0.418691	0.446624	0.424082	0.447237	0.446624	0.429015	0.421663	0.438653	0.436452	0.445404	0.412209	0.425768	0.42606	0.423759	0.439859	0.432361	0.452342	0.447859	0.446216	0.445109	0.43097	0.43632	0.428435	0.430734	0.436758	0.443187	0.43566	0.444283	0.428417
[truncated: 38 more columns]

## Sheet: Similarity Matrix
	1-RussiaRABV	2-ChinaRABV	3-PeruRABV	4-ThailandRABV	5-ThailandRABV	6-ThailandRABV	7-MexicoRABV	8-MexicoRABV	9-SriLankaRABV	10-TunisiaRABV	11-IndiaRABV	12-IndiaRABV	13-IndiaRABV	14-IndiaRABV	15-GABONRABV	16-PeruRABV	17-ArizonaBatRABV	18-ArizonaBatRABV	19-TennesseeBatRABV	20-TennesseeBatRABV	21-TennesseeBatRABV	22-WashingtonBatRABV	23-WashnigtonBatRABV	24-WashingtonBatRABV	25-WashingtonBatRABV	26-ArizonaBatRABV	27-AlabamaBatRABV	28-CaliforniaBatRABV	29-BrazilBatRABV	30-MexicoBatRABV	31-TexasSkunkRABV	32-TexasSkunkRABV	33-CaliforniaSkunkRABV	34-CaliforniaSkunkRABV	35-WisconsinSkunkRABV	36-SouthDakotaSkunkRABV	37-ArkansasSkunkRABV	38-PuertoRicoMongooseRABV	39-PuertoRicoMongooseRABV	40-FloridaCatRABV	41-SerbiaRABV	42-TexasCoyoteRABV	43-TexasCoyoteRABV	44-TexasCoyoteRABV	45-AlaskaArcticFoxRABV	46-ArizonaGrayFoxRABV	47-ArizonaGrayFoxRABV	48-TexasGrayFoxRABV	49-TexasFoxRABV
1-RussiaRABV	100
2-ChinaRABV	87.5341	100
3-PeruRABV	87.7569	90.9967	100
4-ThailandRABV	84.3606	85.0826	84.7889	100
5-ThailandRABV	84.6387	84.8246	84.8963	96.9786	100
6-ThailandRABV	84.6387	84.8246	84.8963	96.9786	100	100
7-MexicoRABV	86.6402	91.7784	91.8015	85.7733	85.1355	85.1355	100
8-MexicoRABV	86.3249	91.976	91.6653	85.0028	84.7521	84.7521	95.8696	100
9-SriLankaRABV	85.5556	86.9365	86.9814	86.1405	85.9399	85.9399	85.9621	85.2808	100
10-TunisiaRABV	87.8702	92.2098	92.485	84.9258	84.5901	84.5901	91.2876	91.8189	86.9496	100
11-IndiaRABV	93.3638	88.6723	89.6016	82.8371	83.8315	83.8315	88.6204	88.6522	85.6212	89.5892	100
12-IndiaRABV	85.0077	85.3644	85.7695	85.7327	85.6165	85.6165	85.0749	84.7418	94.8606	86.0695	84.7314	100
13-IndiaRABV	86.6668	97.8098	90.6955	84.4432	84.2704	84.2704	91.4031	91.5208	85.6276	91.8377	88.1634	84.0967	100
14-IndiaRABV	85.0799	86.4541	86.5942	86.2714	86.1703	86.1703	86.4284	85.9196	94.2509	86.6277	84.8774	95.4873	84.9489	100
15-GABONRABV	88.0418	91.8726	92.8052	84.3903	84.5767	84.5767	91.8692	91.9902	87.1304	94.5442	89.7575	85.9885	91.4191	86.118	100
16-PeruRABV	86.483	90.8864	90.7399	84.9198	84.4792	84.4792	90.2782	90.8186	86.0997	91.2392	88.8091	84.5879	90.2536	85.59	91.88	100
17-ArizonaBatRABV	81.0553	82.58	83.1906	81.1986	81.1647	81.1647	82.8186	83.4158	83.943	83.4207	81.4058	83.7145	81.9043	84.2934	83.2621	81.4234	100
18-ArizonaBatRABV	81.5734	83.4052	83.6286	82.2269	81.1742	81.1742	82.8058	82.7564	83.7322	84.0638	81.3341	83.0428	82.1822	83.8999	82.5611	82.7546	87.3995	100
19-TennesseeBatRABV	81.2231	82.4827	83.6382	81.2279	80.8117	80.8117	82.9241	83.4085	83.6797	83.9568	81.307	83.3491	81.8054	83.8471	83.5329	81.7802	97.052	87.0813	100
20-TennesseeBatRABV	81.7275	82.0589	82.9402	80.9304	80.8001	80.8001	82.3175	82.533	84.0651	83.0007	81.3378	83.0977	81.1951	83.513	82.8549	81.7293	96.2838	87.0796	96.2877	100
21-TennesseeBatRABV	81.7366	82.2383	83.3031	81.0497	80.9199	80.9199	82.7667	83.2786	84.2365	82.9076	81.6129	83.6453	81.3771	83.6932	83.6679	82.1867	96.9019	87.3349	96.5172	98.6549	100
22-WashingtonBatRABV	81.1044	82.7054	83.4183	81.4447	80.9495	80.9495	82.3808	82.9855	84.8649	83.3622	81.7375	84.3538	81.5662	84.3879	82.8405	81.9295	94.4702	89.2487	93.9108	94.3938	94.2351	100
23-WashnigtonBatRABV	84.1234	83.6694	84.4009	83.9266	83.2712	83.2712	83.424	83.7536	86.8196	84.9245	83.3464	85.428	82.6456	86.7968	83.8386	82.8311	87.2926	88.4504	87.5561	87.3147	87.6614	88.9485	100
24-WashingtonBatRABV	82.7778	84.5106	84.7624	83.9441	83.375	83.375	84.3464	84.7663	85.2818	84.2577	82.3899	84.2276	83.3191	85.1726	84.1581	82.8719	86.3807	88.1899	86.0413	85.768	86.3008	88.1501	91.44	100
25-WashingtonBatRABV	81.1044	82.7054	83.4183	81.4447	80.9495	80.9495	82.3808	82.9855	84.8649	83.3622	81.7375	84.3538	81.5662	84.3879	82.8405	81.9295	94.4702	89.2487	93.9108	94.3938	94.2351	100	88.9485	88.1501	100
26-ArizonaBatRABV	83.4782	84.2767	84.9242	84.4568	84.1581	84.1581	84.2035	84.1656	86.3073	84.9053	83.1334	85.266	83.4402	86.1859	84.02	83.0122	89.1086	90.601	89.1923	89.878	89.7057	90.9885	91.5507	90.3679	90.9885	100
27-AlabamaBatRABV	80.8693	82.4861	83.5651	81.1487	80.9237	80.9237	82.7462	82.9671	84.3134	83.5135	81.3368	83.9872	81.809	84.2134	83.6511	81.8873	97.5891	87.7731	97.1292	96.5185	96.904	94.8661	87.4874	86.5942	94.8661	89.0305	100
28-CaliforniaBatRABV	83.5291	83.8928	84.9701	84.9514	84.2106	84.2106	84.3554	84.1265	86.2197	85.3892	84.3279	85.6378	82.697	86.478	84.3142	83.851	87.7691	88.8388	88.1112	88.3666	88.1965	89.9133	93.5195	92.1906	89.9133	91.9879	87.9457	100
29-BrazilBatRABV	81.7766	83.0495	84.3379	82.9468	82.211	82.211	83.3214	82.9881	83.7584	83.2556	81.5145	83.764	82.277	84.6357	83.7768	82.4662	85.4093	87.65	85.5796	86.4787	86.6466	87.5542	88.8566	87.1841	87.5542	90.3724	86.3066	89.0419	100
30-MexicoBatRABV	80.511	80.2974	81.7348	80.773	79.8346	79.8346	82.0998	81.3508	81.403	81.5237	79.5938	81.7548	79.4795	81.9043	81.4377	80.2524	83.5867	86.1343	84.0417	84.6944	84.3202	85.4324	86.9445	85.1286	85.4324	88.1544	84.3407	86.6852	93.9772	100
31-TexasSkunkRABV	82.2171	88.4044	85.7856	83.8095	83.4247	83.4247	85.8095	85.3928	83.026	85.4154	84.2637	83.3511	87.274	82.9999	85.3156	84.8598	83.0489	83.6004	83.1477	82.8816	83.0775	83.9235	85.4996	85.697	83.9235	85.2053	82.5063	86.0606	82.7776	81.1011	100
32-TexasSkunkRABV	81.1885	81.6916	82.3876	82.9697	82.0161	82.0161	82.75	81.9588	82.1991	82.0873	81.1011	82.5755	80.411	82.1105	81.8579	80.7224	83.0351	83.7823	82.7683	83.2414	83.6125	84.6949	86.1115	86.7434	84.6949	85.594	82.5887	86.8522	82.9856	81.6872	92.8119	100
33-CaliforniaSkunkRABV	87.4554	91.0712	91.9015	84.5968	84.6914	84.6914	91.4597	91.659	86.0274	91.5691	91.6094	85.3278	90.6905	85.4472	91.8884	91.1617	82.0245	82.1876	82.2893	81.7728	82.1485	81.9769	83.286	83.2039	81.9769	83.6051	82.2078	84.0937	82.5537	80.7275	85.1785	81.3818	100
34-CaliforniaSkunkRABV	87.2829	91.0773	91.907	84.593	84.6877	84.6877	91.2992	91.3377	85.8529	91.4093	91.2821	85.3313	90.697	85.4507	91.7288	91.1677	82.2078	82.1832	82.2937	81.9564	82.3313	82.1599	83.4662	83.3932	82.1599	83.7851	82.5778	84.0976	82.8338	80.7323	85.3702	81.3865	98.9556	100
35-WisconsinSkunkRABV	88.5645	92.3176	92.8125	85.3136	85.1294	85.1294	91.715	91.4271	87.3214	93.8407	89.7683	87.4212	91.5428	87.4567	93.3567	92.0651	82.551	83.454	83.0014	82.8514	82.8514	82.6761	84.5245	84.0979	82.6761	85.3861	82.5467	85.173	83.7273	82.0979	85.2683	81.6532	92.4794	92.4811	100
36-SouthDakotaSkunkRABV	87.2731	91.5682	92.1595	84.2095	84.3887	84.3887	90.9659	90.7538	86.1892	92.8711	88.998	85.468	91.1905	85.5063	92.8695	92.376	82.3437	83.4354	82.9058	83.2966	83.2966	82.5846	84.0659	84.0878	82.5846	84.4077	83.2645	84.3415	84.4584	82.2955	84.3478	80.9582	92.3071	92.3088	94.5643	100
37-ArkansasSkunkRABV	87.358	91.8763	92.8752	84.6245	84.8032	84.8032	91.0349	91.3994	86.7637	93.6676	89.5857	85.8764	91.5007	86.2714	93.1846	92.1974	82.1149	83.0336	82.6627	82.6059	82.793	82.5321	84.1026	83.705	82.5321	84.35	82.6661	84.1234	83.9379	81.9711	85.6087	81.9134	92.3751	92.2161	95.0245	96.1161	100
38-PuertoRicoMongooseRABV	86.3297	89.577	90.1147	83.0032	83.0074	83.0074	88.7745	88.9067	85.0549	91.172	87.7385	84.2422	89.0898	84.7203	91.3274	89.4071	81.0272	80.6418	81.4707	81.0377	80.7643	81.0453	82.3835	82.0201	81.0453	82.6386	80.7166	82.6842	81.8755	80.175	83.3239	79.8516	89.5026	89.2556	92.6708	91.7604	91.8264	100
39-PuertoRicoMongooseRABV	87.3466	90.9022	91.747	83.8154	83.9154	83.9154	90.2017	90.2433	85.8427	91.9728	89.1512	85.5539	90.5176	85.3558	92.3681	90.8081	82.5104	82.9628	82.8813	82.6334	82.6334	82.7336	83.6757	83.6036	82.7336	84.2613	82.5912	83.9609	83.4076	81.5735	84.4075	81.1133	91.561	91.4819	94.3218	93.3519	93.7387	95.0061	100
40-FloridaCatRABV	83.6517	84.5616	85.3833	84.2898	83.463	83.463	85.0494	85.7354	84.7683	85.2783	83.9508	84.7024	83.7305	85.2026	85.1007	83.475	87.9416	88.0876	88.2964	88.0425	88.7339	89.0071	91.5522	90.5049	89.0071	90.2794	87.7754	91.2323	88.6442	86.7137	85.2985	86.0298	85.0786	85.075	86.0178	84.7749	84.6424	83.7448	85.7167	100
41-SerbiaRABV	87.8017	90.8932	91.7512	84.5788	84.4001	84.4001	91.4414	91.3173	86.1944	93.3476	89.8176	84.9636	90.4302	85.6259	93.4182	91.4677	82.2831	82.7029	82.199	81.96	82.2368	82.6	83.4329	83.8219	82.6	83.0472	82.1086	83.6283	82.6266	80.7042	84.3554	81.9179	91.6423	91.6481	92.3066	91.9687	92.372	90.5039	92.0507	84.3057	100
42-TexasCoyoteRABV	86.4787	92.609	91.6485	85.4189	84.9942	84.9942	94.8392	95.2511	86.836	92.4566	88.3833	85.4318	92.2404	86.8588	91.714	91.3003	83.7305	83.375	83.0918	82.9453	83.1403	83.0411	84.0786	84.542	83.0411	84.2229	83.3791	84.199	82.8484	81.1249	86.0023	82.309	91.3953	91.2351	91.6561	91.39	92.0336	89.3016	90.3874	85.5172	91.2896	100
43-TexasCoyoteRABV	87.1223	92.9533	92.159	85.8177	85.5686	85.5686	95.3261	95.7331	87.222	92.8014	89.0089	86.0889	92.7499	87.1613	92.2249	91.7341	84.3195	83.9669	83.8636	83.5402	83.733	83.635	84.6619	85.1238	83.635	84.8061	83.9709	84.6058	83.4444	81.7384	86.5701	82.9155	91.9083	91.7491	91.9254	91.9034	92.5424	89.8369	90.9096	86.0874	91.8048	99.2537	100
44-TexasCoyoteRABV	87.227	93.1143	92.3307	85.9938	85.5721	85.5721	95.1686	95.5768	87.3036	92.8088	89.1089	85.9993	92.7516	87.3285	92.2329	91.7322	83.8747	83.7982	83.332	83.2703	83.4639	83.5506	84.4034	85.1476	83.5506	84.7224	83.5248	84.6967	83.537	81.8332	86.6771	83.0331	91.9065	91.7473	92.0057	91.8228	92.47	89.7588	90.9951	86.0874	91.6519	99.1037	99.4051	100
45-AlaskaArcticFoxRABV	91.812	87.022	88.1016	83.8928	83.7202	83.7202	86.7017	87.1114	85.2559	87.9603	91.3865	84.9132	85.9742	85.0583	87.6328	87.3359	82.5303	82.5757	82.2497	81.7229	81.9923	82.5058	84.1257	83.3136	82.5058	83.9413	81.9708	84.5078	82.787	81.1486	83.3888	81.9913	87.6172	87.4507	88.1445	87.0971	87.7057	85.4587	87.5193	84.6512	87.9704	86.9802	87.4507	87.6393	100
46-ArizonaGrayFoxRABV	85.4434	90.5894	89.8678	83.4932	82.8619	82.8619	90.7424	90.7721	85.5617	89.3325	86.4088	83.9449	90.0352	85.1468	90.3565	89.2422	81.1742	81.0802	81.8554	81.3565	81.4303	81.1325	82.6317	82.148	81.1325	82.6377	82.1435	82.5784	81.7659	80.4852	83.387	79.3406	89.1038	89.2777	90.3565	89.7672	89.8332	87.6494	88.4118	83.6206	88.9064	90.4107	90.6901	90.7699	85.0847	100
47-ArizonaGrayFoxRABV	86.801	91.6931	90.9811	84.8341	84.7224	84.7224	91.8491	91.6302	86.6859	90.6212	88.0948	85.4406	91.4006	86.1072	91.626	90.4511	81.814	82.0169	82.5567	81.9664	82.4237	81.681	83.4459	82.9544	81.681	83.5336	82.4948	83.3113	82.3156	80.7546	84.5585	80.595	90.5552	90.7252	90.9738	91.0449	90.9486	88.4525	89.7973	84.5179	90.3672	91.1945	91.7112	91.4662	86.8834	97.6656	100
48-TexasGrayFoxRABV	87.159	95.0985	91.1679	85.5169	85.3466	85.3466	91.8777	91.907	86.2399	92.6238	88.2292	85.079	94.3592	86.1807	92.0475	90.5733	82.8989	82.9426	82.3559	82.3934	82.0918	82.4652	83.5683	84.6014	82.4652	84.356	82.5269	83.7781	82.7641	81.0634	86.5495	80.9118	90.8341	90.8404	92.1532	91.5746	91.64	89.7582	90.6604	85.0121	90.9043	92.6162	92.9601	92.9585	87.0072	91.8524	92.4459	100
49-TexasFoxRABV	88.2175	96.1133	92.2397	85.8897	85.7236	85.7236	92.7674	92.8788	86.4389	93.2788	89.5173	85.9041	95.5434	86.3872	92.9478	91.651	83.6517	83.693	83.2719	82.8514	83.2145	83.1242	84.4884	84.7061	83.1242	84.6437	83.4523	84.5275	83.8738	81.8205	87.2664	81.7834	92.3977	92.5594	93.3792	92.9606	93.1901	90.6891	92.2233	85.47	91.9778	93.1838	93.6822	93.5224	87.796	91.8458	93.0104	97.1315	100
50-TexasGrayFoxRABV	87.346	95.1024	91.337	85.6231	85.4532	85.4532	91.7141	91.9136	86.3372	92.7896	88.407	85.3601	94.3637	86.1065	92.1344	90.7484	82.8251	83.0552	82.262	82.206	82.0182	82.5785	83.4944	84.5271	82.5785	84.2819	82.5424	83.888	82.6901	81.0539	86.6536	81.0304	91.1704	91.1765	92.2415	91.7428	91.8083	90.102	90.9145	84.9381	91.0744	92.6221	92.9657	92.9641	87.1882	91.5238	92.3716	99.554	97.1337
51-NamibiaLionRABV	87.5483	91.7992	92.3973	84.1157	83.8338	83.8338	92.1126	92.7916	85.9741	94.6318	89.3463	85.0043	91.5085	85.1417	94.7822	91.727	82.5964	82.7861	83.0477	82.7277	82.9142	82.3603	83.3031	83.3614	82.3603	83.6557	82.7794	83.61	82.6679	81.0511	85.0165	81.8391	91.5633	91.7307	93.2803	92.7031	93.425	90.6694	92.4537	84.2043	93.664	92.7138	93.215	93.0634	87.2775	89.7575	91.1202	91.8899	93.1104
52-FranceRABV	87.7696	91.1437	91.8288	84.5368	83.8258	83.8258	91.1113	91.3213	86.2164	93.4227	88.896	84.6194	90.6013	85.5519	93.5831	91.3925	82.1238	83.2884	81.8594	81.97	82.0687	81.9726	83.5336	84.1464	81.9726	83.5368	81.9485	83.8558	82.7487	81.0148	83.9015	81.0276	91.3885	91.5565	92.867	92.3781	92.3737	90.0833	91.8021	84.4635	96.5068	91.1268	91.4813	91.4902	87.3533	89.3236	90.4494	91.475	92.3013
53-FranceRABV	87.9546	91.2362	92.1603	84.5579	84.0239	84.0239	91.2856	91.4941	86.4061	93.4309	89.2442	84.9897	90.941	85.5714	93.8289	91.6461	82.1486	83.3114	82.0643	81.9951	82.2726	81.9977	83.5561	84.08	81.9977	83.5593	82.1531	83.79	82.9511	81.0415	83.8354	80.963	91.7232	91.8903	92.876	92.708	92.7039	90.2612	92.1348	84.4846	96.7417	91.1381	91.6538	91.5009	87.5394	89.3375	90.7893	91.4858	92.6314
54-GreeceRABV	88.3252	90.7354	92.0847	84.9446	84.5922	84.5922	91.7751	91.65	86.38	93.6718	89.9988	85.1538	90.4359	85.8995	93.5868	91.4804	82.6684	83.0869	82.7625	82.524	82.6215	82.9745	83.9867	84.0161	82.9745	83.4198	82.3164	83.8222	82.8244	81.09	84.3653	82.3088	91.8125	91.6529	92.7978	92.1415	92.5437	91.1783	92.3873	84.8546	99.4049	91.6235	92.1356	91.9829	87.9834	89.08	90.3729	91.0723	91.9825
55-ItalyRABV	87.2153	90.3766	91.2321	83.7743	83.327	83.327	90.5882	90.8025	85.4758	92.6783	88.3521	84.0341	90.0731	84.8019	93.0024	90.7079	81.6096	82.6844	81.4294	81.3602	81.46	81.3629	82.9384	83.4672	81.3629	82.9417	81.3377	83.3581	82.1444	80.3923	83.1361	80.2229	90.8694	91.0391	92.1175	91.9488	91.7803	89.9197	91.2033	83.8778	95.8742	90.4403	90.9637	90.81	86.7137	88.6156	89.9207	90.7935	91.7907
56-LabStrainUSA	88.3148	91.7171	92.7983	85.712	85.975	85.975	91.1202	90.9159	86.586	92.9465	89.8434	86.3424	91.3401	86.648	92.8602	91.7141	83.1475	82.0598	83.5158	83.0744	83.2604	82.4375	83.3268	84.292	82.4375	84.0309	83.2488	83.8888	83.1493	81.2677	85.179	81.7357	92.2139	91.8899	94.0692	93.5887	94.2244	91.1665	92.607	85.5644	92.3733	91.6307	92.1424	92.1505	88.6664	88.7374	90.1188	90.9905	92.3873
57-LabStrainUSA	87.9619	98.654	91.257	85.6212	85.2775	85.2775	92.5215	92.3925	86.516	92.7055	89.0135	84.9286	98.1163	85.9377	92.1334	91.0646	83.2249	83.5859	82.9502	82.5278	82.5278	82.9804	83.9407	84.6965	82.9804	84.8127	82.9535	84.079	83.4167	80.8594	88.4813	81.5876	91.3313	91.3373	92.8905	92.0675	92.3747	90.0915	91.3254	84.9213	91.1586	93.1025	93.4432	93.6031	87.2004	91.1808	92.0342	95.6526	96.3521
58-LabStrainEurope	87.9647	98.8046	91.5823	85.6246	85.4547	85.4547	92.6036	92.5543	86.6898	92.7072	89.3488	85.2803	98.4201	85.9411	92.4567	91.3915	83.229	83.59	83.1326	82.5321	82.7106	82.9846	83.9446	84.7003	82.9846	84.8164	83.1359	84.0829	83.5981	80.8642	88.4841	81.5923	91.6567	91.6624	92.7329	92.3904	92.6972	90.2589	91.651	84.925	91.4848	93.1041	93.6031	93.6045	87.373	91.0193	92.3585	95.4981	96.6612
59-GeorgiaRABV	80.1201	81.4847	82.3379	81.9324	80.8595	80.8595	82.8907	81.3461	82.3297	81.0783	80.3422	81.8882	80.4176	82.0303	80.3113	79.9113	81.844	84.2903	81.6738	82.3191	82.2295	83.7153	85.4265	86.3946	83.7153	84.9662	82.0509	85.7125	82.6299	81.3826	86.3396	88.2486	81.1287	81.1335	80.9236	80.8101	80.6962	78.7165	80.497	85.6266	81.6532	81.8533	82.4636	82.3778	80.8584	79.2166	80.6531	81.7512	81.2974
60-ARAV	69.4486	68.1542	69.8878	69.7096	69.6039	69.6039	68.3477	67.6297	69.1172	68.0726	68.3569	70.5453	67.3414	69.8162	68.652	67.2499	69.8805	69.6288	69.5384	69.4587	69.5326	69.8993	70.6956	70.7985	69.8993	71.4975	70.6769	70.2788	70.7794	68.8003	70.2729	70.643	68.5834	68.7959	67.6627	68.4754	68.0982	66.6973	68.4466	69.8264	67.9779	69.2274	70.0477	69.9826	69.7671	68.0849	69.0179	69.2156	68.6097
61-KHUV	70.739	69.6292	69.8729	70.7437	70.9179	70.9179	70.8278	70.7224	72.0075	68.5797	69.7081	71.0038	68.1312	70.3244	69.7683	69.8744	69.6661	69.5868	69.4214	68.7302	69.4653	69.8076	70.9928	71.2655	69.8076	70.2998	70.6216	70.3383	69.6042	69.4915	69.5625	69.5264	70.8432	70.2693	69.5031	69.8083	69.2642	68.6952	69.9442	71.1404	69.3052	70.4267	71.2868	71.1456	71.4186	69.0999	70.3061	69.127	69.3696
62-DUVV	65.3213	67.6861	67.467	67.579	67.2049	67.2049	67.5341	67.7778	65.9222	68.3688	66.5211	66.8877	66.4329	65.7373	68.4825	67.6384	67.2041	64.9455	67.1409	66.3698	66.7926	66.4865	68.0699	66.881	66.4865	66.5148	67.3869	65.6894	66.3351	66.5864	67.0299	65.9342	67.0673	67.1863	68.0175	69.1111	68.2302	67.1301	68.58	67.2057	68.3811	67.7678	68.6228	68.5763	67.0004	66.3451	67.5929	67.5404	67.259
63-65-A15-1873-DUVV	65.2918	67.6591	67.4399	67.5519	67.1775	67.1775	67.507	67.7509	65.793	68.3426	66.4929	66.7602	66.4044	65.608	68.4564	67.7298	67.2955	65.0378	67.2325	66.4614	66.8842	66.5784	68.3131	66.9727	66.5784	66.6066	67.4783	65.7811	66.4265	66.4582	67.0021	65.9052	67.0396	67.1588	67.7746	69.0857	68.2039	67.222	68.5539	67.2971	68.3548	67.7409	68.5968	68.5503	66.9727	66.3167	67.5659	67.5134	67.2316
64-DUVV	65.3213	67.3502	67.4479	67.9047	67.5309	67.5309	67.0799	67.542	66.263	67.9377	66.0627	67.4622	66.0909	66.0984	67.8171	67.5392	67.0852	64.6898	66.8025	66.2497	66.6729	66.5867	67.8874	66.5216	66.5867	66.615	67.268	65.5479	66.1951	65.7848	66.7713	66.3762	66.6095	66.9481	67.349	68.8787	68.2302	66.55	67.8937	67.3052	67.9487	67.4319	68.1728	68.3426	66.5429	66.4747	67.5036	67.4223	67.0215
65-DUVV	65.2918	67.5407	67.4208	67.5519	67.1775	67.1775	67.2702	67.732	66.0139	68.127	66.2537	67.217	66.2836	65.8493	68.0066	67.7298	67.0576	64.5472	66.9939	66.2211	66.6448	66.5584	67.8606	66.4932	66.5584	66.5867	67.2406	65.5185	66.1665	65.9769	66.7432	66.1266	66.8009	66.9203	67.5389	68.853	68.4195	66.5217	68.084	67.2777	68.1386	67.2858	68.1464	68.3164	66.7341	66.6656	67.6932	67.2767	66.9938
66-ABLV	73.8464	73.3428	73.6036	74.8562	73.5725	73.5725	73.7354	73.4364	73.7487	74.8674	73.6588	73.9906	72.2285	72.9816	73.3241	73.5716	72.3243	71.9369	72.2976	72.1847	72.2434	71.9591	72.5599	71.9827	71.9591	71.9655	72.5007	72.3628	73.1764	72.3692	72.7048	72.6395	73.7199	73.6339	74.2483	73.9525	73.9194	71.6509	73.5202	73.1945	73.0258	73.5466	74.2544	74.0081	75.1354	72.4292	73.1797	73.8406	73.7212
67-ABLV	74.1752	73.8614	74.1199	75.0551	73.9893	73.9893	74.0352	74.1645	73.6339	75.3771	73.7736	73.8758	72.7557	73.1763	73.7496	74.0868	72.5362	72.2525	72.5097	72.3971	72.456	72.3768	72.9728	72.3985	72.3768	72.3831	72.493	72.5591	73.5887	72.784	73.1196	72.9598	73.6194	73.5334	74.3482	74.0526	74.0197	71.7541	73.8372	73.5042	73.4378	74.0623	74.7651	74.5207	75.6577	73.0628	73.9136	74.3552	74.2368
68-EBLV-1	69.2213	68.277	69.0005	67.5232	67.7852	67.7852	67.2965	67.6482	68.1308	69.4271	68.6715	66.8206	66.9448	67.0051	68.499	67.7113	67.7757	66.3798	68.251	68.5201	67.9598	67.698	68.7076	68.0134	67.698	67.2593	68.1502	69.609	68.6205	67.0676	66.0549	66.6254	67.6482	67.416	68.6303	68.7643	68.4071	67.0937	68.0425	68.5074	68.8002	68.3397	69.0208	68.8725	69.6384	67.0977	68.3658	67.3413	68.2508
69-EBLV-1	68.6615	67.37	68.4302	67.2777	67.5407	67.5407	66.7158	67.0699	67.5423	68.859	67.9894	66.1125	66.0203	66.4116	67.883	67.2522	67.0755	65.7795	67.5522	67.9425	67.3788	67.1051	68.123	67.4221	67.1051	66.7821	67.4511	69.0303	68.1518	66.8102	65.2284	66.0331	66.8427	66.6084	68.0591	68.1943	67.8347	66.5065	67.4655	67.922	68.2271	67.7657	68.4529	68.3031	68.9645	66.2385	67.5227	66.8606	67.3429
70-EBLV1	69.8417	68.6484	69.3692	68.1806	68.5472	68.5472	67.8892	68.0048	68.6746	69.9087	68.871	67.4942	67.3249	67.4384	69.2539	68.3092	67.9455	66.9825	68.4197	68.3548	68.0116	67.9582	68.9815	68.3903	67.9582	67.5218	68.3193	69.8791	68.7696	67.295	66.3782	66.6604	68.355	68.1248	68.7868	69.0914	68.7778	67.4656	68.8635	68.6654	68.939	68.9251	69.5996	69.4529	69.8156	67.633	68.8936	68.0498	68.8544
71-EBLV-2	68.2404	69.3038	68.9347	67.8276	67.8542	67.8542	70.0194	70.2221	67.4575	68.6474	67.2659	67.2515	68.0767	67.9578	69.8576	68.8988	68.1009	67.4148	68.0386	67.4006	67.581	68.4665	68.088	67.7058	68.4665	68.1619	68.3581	67.5794	68.7942	65.6747	68.3058	67.6782	68.2715	68.4328	68.7166	69.7439	68.8362	67.5117	69.8246	67.8615	68.0259	69.6457	70.6614	70.7353	67.3943	67.8101	68.4753	69.0258	69.1875
72-EBLV-2	67.6046	68.9229	70.823	68.3628	68.0501	68.0501	70.8069	70.4556	68.4739	69.1421	67.0582	68.9037	68.1217	68.7957	70.2302	69.4862	68.2097	66.6199	68.2358	67.4908	68.0122	68.5567	68.7057	67.429	68.5567	68.0467	68.5733	68.54	68.4943	66.1354	68.5374	68.0511	68.8556	69.4753	69.4033	70.3347	68.9768	68.1859	69.7035	67.3514	68.4084	69.728	70.8055	70.5587	67.0002	67.6948	68.8048	68.8392	69.336
73-EBLV-2	67.4892	68.7914	69.9797	67.8182	67.5062	67.5062	70.2794	69.8017	67.8073	69.0792	66.6176	68.265	67.772	68.4681	70.0139	69.0223	67.9501	66.7105	67.7616	67.6791	67.429	68.7626	68.1364	67.0874	68.7626	67.3159	68.6544	68.0947	68.165	65.8672	68.072	67.698	68.4236	68.8153	69.1672	70.1015	68.9694	67.9533	69.9069	67.226	67.8307	69.4048	70.2779	70.2386	67.2076	67.7757	68.1219	68.7076	68.887
74-EBLV2	67.2818	68.9229	70.1963	68.2562	67.9437	67.9437	70.4948	70.3509	68.2608	69.0363	66.6258	68.4772	67.9064	68.7957	69.8114	69.2758	68.3168	66.7285	67.9143	67.3831	67.7976	68.4498	68.5991	67.3211	68.4498	67.9392	68.5733	68.433	68.0653	66.0258	68.6447	67.9425	68.2185	68.8407	69.2978	70.1256	68.7643	67.8626	69.4928	67.2436	68.1956	69.6228	70.4934	70.4544	67.0002	67.8023	68.5923	68.7331	68.9124
75-IRKV	67.8909	67.5336	67.9532	67.5734	67.6467	67.6467	68.4989	68.0001	66.8302	67.8845	69.4147	68.1912	66.4251	66.7657	67.1055	67.1553	66.1241	67.0182	66.5213	66.2724	66.465	65.1021	68.206	67.5421	65.1021	67.6695	66.95	69.3739	67.6373	66.9403	67.2203	67.98	68.1285	68.3441	67.6499	67.1882	66.8806	66.2288	67.9814	68.6264	67.783	67.6688	68.7838	68.4727	68.3597	66.8331	68.2282	67.3956	67.8752
76-BBLV	67.3863	68.9804	69.0147	66.738	66.217	66.217	68.3598	68.6415	67.3099	69.2628	67.9329	67.1473	68.0772	65.7626	68.0695	67.497	66.0864	66.2211	65.9057	66.5391	65.9057	67.1945	65.6269	66.3356	67.1945	65.5508	66.7922	64.235	67.6325	65.9548	66.8887	65.4457	68.4803	68.6696	67.9127	68.7614	68.5758	67.7462	68.6826	67.3733	67.9672	69.1032	70.0817	69.8224	68.4678	66.765	68.0246	69.1478	69.31
77-MOKV	63.6085	64.047	63.2425	61.7525	62.5236	62.5236	64.0268	63.6992	63.8152	63.7678	62.7086	64.8784	63.0738	64.1728	64.3464	62.0399	64.9588	62.446	63.7678	64.7362	64.4282	63.1801	63.2061	64.8556	63.1801	63.6975	64.4594	63.7568	63.39	63.0551	64.2306	63.6634	63.6563	64.4793	64.0672	64.3216	63.0764	62.8991	63.3654	63.4435	62.8061	64.22	64.5364	64.5364	64.3814	62.4152	63.0213	64.4594	64.5827
78-MOKV	64.0621	64.6132	66.086	63.4615	63.5892	63.5892	65.6038	64.2941	64.105	63.9063	63.3627	64.2284	63.7602	63.845	65.1137	63.9671	61.6407	63.4174	61.1787	62.273	61.9485	61.8695	63.1003	64.2559	61.8695	63.0114	61.7797	62.5582	64.3469	63.0738	64.4991	63.6857	64.5331	64.7682	64.0092	63.6879	64.3033	63.2443	64.3374	62.1535	63.39	64.7331	64.9973	65.1193	63.2364	63.0607	63.4462	63.9754	64.8394
79-MOKV	65.0338	63.9059	64.6499	63.5582	64.6353	64.6353	65.1386	65.4908	63.4795	64.6725	64.3972	64.9385	63.5018	64.2635	65.9887	62.684	64.7457	63.0302	63.7635	64.0805	64.5103	63.0213	63.5898	62.827	63.0213	63.6697	63.7119	63.1249	63.2764	62.0985	64.3389	63.0055	64.3881	64.9795	64.783	65.3578	65.812	63.6063	64.9973	63.2319	64.7665	64.5092	65.0466	64.8237	65.0547	63.1137	64.2834	64.0058	64.8058
80-MOKV	65.0667	64.642	64.783	63.3113	64.6544	64.6544	65.5348	64.774	64.3449	64.5677	64.6606	64.7935	63.4269	64.0755	65.5928	63.2149	64.2599	64.3652	63.3209	64.7435	64.6815	62.9983	63.9494	65.4342	62.9983	64.6584	64.2415	63.3719	63.5613	62.8534	63.5824	63.0131	63.4709	64.1816	64.4447	64.2383	64.0428	61.961	64.2908	64.2833	63.8402	64.2816	64.5479	64.8433	65.526	62.8791	64.0989	64.8859	64.8467
81-MOKV	63.6196	64.2833	63.2538	61.9946	62.7638	62.7638	64.2633	63.9354	63.5787	63.7789	62.5833	64.6443	63.3131	63.9371	64.3572	62.0517	64.9694	62.4576	63.7789	64.7469	64.439	63.1914	63.2173	64.8662	63.1914	63.9337	64.4702	63.7678	63.4012	63.0664	64.4668	63.9021	63.7806	64.6025	64.0781	64.557	63.3142	62.6593	63.1273	63.2061	62.8176	64.4555	64.7707	64.7707	64.3921	62.6548	63.2588	64.6951	64.8181
82-LBV	63.4583	65.2751	64.8926	65.1914	65.4424	65.4424	65.5564	65.2925	64.7588	64.5029	64.2942	66.6996	64.3066	64.6209	63.5688	64.4069	63.5333	63.8058	63.9665	64.3431	64.0788	63.8226	64.5906	65.7848	63.8226	65.1239	64.3952	64.7831	65.9059	64.7039	66.5598	64.1212	66.4416	66.4515	65.9548	66.6955	64.3016	64.1694	64.9829	64.6628	63.8353	64.8293	65.5925	65.4925	64.4331	64.7307	65.1204	66.1644	64.8926
83-LBV	63.6514	65.0933	65.3371	65.303	65.5541	65.5541	65.4582	65.2527	64.5357	64.8171	64.7092	66.8343	64.2435	64.53	63.6277	64.477	64.1298	63.8869	64.0914	63.8743	64.0587	64.0486	64.2147	65.8868	64.0486	64.8611	64.8538	64.4183	65.0803	63.8894	66.0501	64.5628	66.5131	66.5231	66.2657	66.548	64.7271	64.3631	64.9319	64.521	64.2635	64.6774	65.4427	65.3425	64.7374	64.7905	65.4012	66.2356	65.1849
84-LBV	64.9244	65.9767	65.4871	65.5934	65.813	65.813	65.7394	66.1033	64.548	66.3437	65.135	66.5413	65.4615	64.8059	65.5461	65.6539	64.0772	64.1744	64.6831	64.7331	64.4696	64.1911	64.8148	66.1521	64.1911	64.84	64.6409	64.7953	66.1997	65.3441	67.0562	64.4741	67.2179	66.9548	67.197	67.6156	66.1744	65.5522	66.0211	65.5239	65.3594	65.4253	66.0731	66.1928	65.0941	64.427	64.8188	67.1044	66.5427
85-LBV	63.6826	65.6163	64.9929	65.4113	65.6625	65.6625	65.8973	65.6335	64.7588	64.6036	64.5169	66.6996	64.6522	64.6209	63.67	64.6288	63.5333	63.8058	63.9665	64.3431	64.0788	63.8226	64.5906	65.7848	63.8226	65.1239	64.3952	64.7831	65.9059	64.7039	66.5598	64.1212	66.6608	66.6707	65.8348	66.5762	64.1793	64.0462	64.8611	64.6628	63.9365	65.1728	65.933	65.8331	64.534	64.852	65.4613	66.5031	65.2352
86-SHIBV	62.7439	65.2294	65.8034	67.0804	65.6434	65.6434	65.5919	65.5935	65.5872	65.972	63.4617	66.0216	64.9283	65.0571	65.5776	64.836	67.0409	66.1218	66.9338	66.6866	66.2924	66.5812	66.5972	66.0949	66.5812	66.077	67.3127	66.6586	67.3149	66.036	66.8027	65.4064	63.8196	64.1908	66.0857	66.256	66.213	64.4896	66.2334	68.0475	65.4635	65.5609	66.2645	65.9805	63.6519	64.6006	65.5998	66.3102	65.5016
87-WCBV	64.7724	62.8416	65.8257	65.7894	66.1951	66.1951	64.2039	65.0482	63.8355	64.2111	64.6079	64.1757	62.6035	64.2685	64.4455	63.2459	64.047	63.2286	62.6806	63.4915	64.477	64.3141	63.5629	64.0344	64.3141	64.6229	64.0874	63.3335	62.5701	61.5396	64.9984	66.0074	63.4692	63.8417	64.7195	63.7788	64.1276	62.4912	63.5901	64.753	63.4658	65.0676	65.7206	66.009	64.9263	64.4459	65.4789	63.3383	63.9528
88-IKOV	57.9958	57.0626	56.4372	57.5899	58.0365	58.0365	57.9563	57.6883	56.3817	56.3144	56.5049	56.0925	56.2047	56.177	56.0287	55.8015	57.7682	56.5436	57.4125	57.887	58.1309	55.3376	57.5918	55.2763	55.3376	57.0985	57.8337	56.1347	56.3548	55.4596	58.7791	57.4232	57.394	57.6241	56.0141	56.7639	54.7658	55.2141	55.3784	55.4891	56.903	56.368	57.1565	56.9266	56.3242	55.6813	56.434	55.5717	57.1583
[truncated: 39 more columns]

## Sheet: Caption
Table. Estimates of Evolutionary Divergence between Sequences
The number of base substitutions per site from between sequences are shown. Analyses were conducted using the Maximum Composite Likelihood model [1]. The analysis involved 88 nucleotide sequences. Codon positions included were 1st+2nd+3rd+Noncoding. All positions containing gaps and missing data were eliminated. There were a total of 1350 positions in the final dataset. Evolutionary analyses were…
1. Tamura K., Nei M., and Kumar S. (2004). Prospects for inferring very large phylogenies by using the neighbor-joining method. Proceedings of the National Academy of Sciences (USA) 101:11030-11035.
2. Tamura K., Stecher G., Peterson D., Filipski A., and Kumar S. (2013). MEGA6: Molecular Evolutionary Genetics Analysis version 6.0. Molecular Biology and Evolution30: 2725-2729.
Disclaimer: Although utmost care has been taken to ensure the correctness of the caption, the caption text is provided "as is" without any warranty of any kind. Authors advise the user to carefully check the caption prior to its use for any purpose and report any errors or problems to the authors immediately (www.megasoftware.net). In no event shall the authors and their employers be liable for a…
